# Supplementary material for: New insight into high-temperature driven morphology reliant CoMoO4 flexible supercapacitors
Source: Royal Society of Chemistry journal article supplement (doi:10.1039/c5nj00446b), 2015-01-01
Supplement: c5nj00446b1.pdf [file c5nj00446b1.pdf]

## **Electronic Supplementary Information (ESI)**

# **New Insight into High-Temperature Driven Morphology Reliant CoMoO<sub>4</sub> Flexible Supercapacitor**

**John Candler<sup>a</sup>, Tyler Elmore<sup>a</sup>, Bipin Kumar Gupta<sup>b</sup>, Lifeng Dong<sup>c</sup>, Soubantika  
Palchoudhury<sup>d</sup>, Ram K. Gupta<sup>a\*</sup>**

<sup>a</sup>Department of Chemistry, Pittsburg State University  
1701 S. Broadway, Pittsburg, KS 66762, USA

<sup>b</sup>National Physical Laboratory (CSIR), Dr K.S. Krishnan Road, New Delhi 110012, India

<sup>c</sup>Physics, Astronomy, and Materials Science, Missouri State University  
901 S. National Avenue, Springfield, MO 65897

<sup>d</sup>Center for Materials for Information Technology, The University of Alabama, Tuscaloosa, AL-  
35487

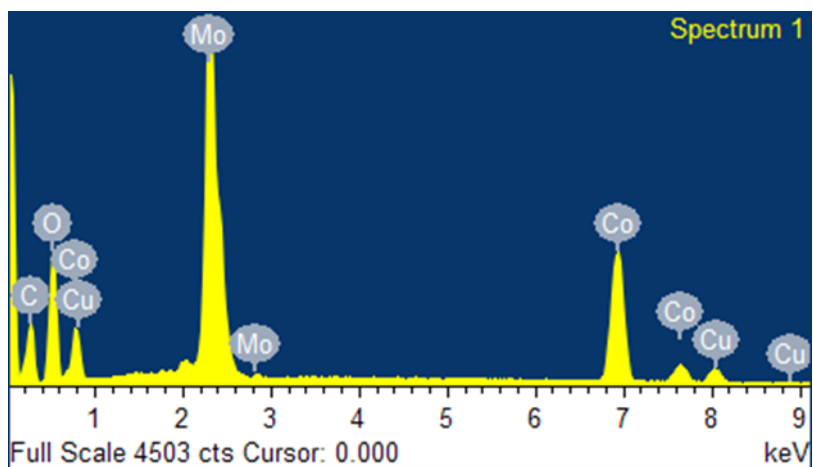

**Fig. 1S:** Energy-dispersive X-ray spectroscopy of CMO-3.

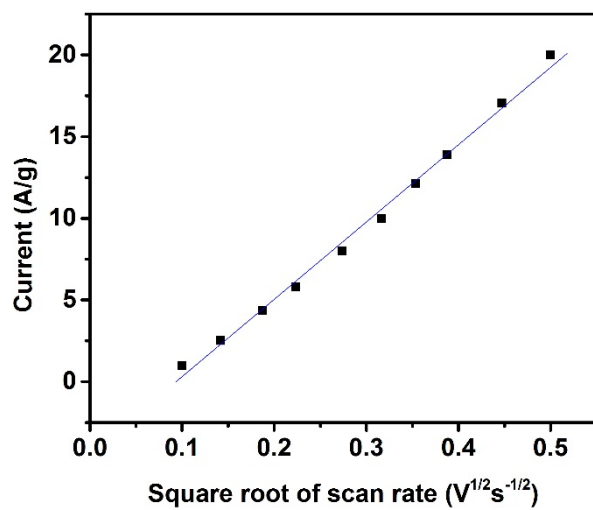

**Fig. 2S:** Variation of peak current as a function of square root of scan rate for CMO-3.

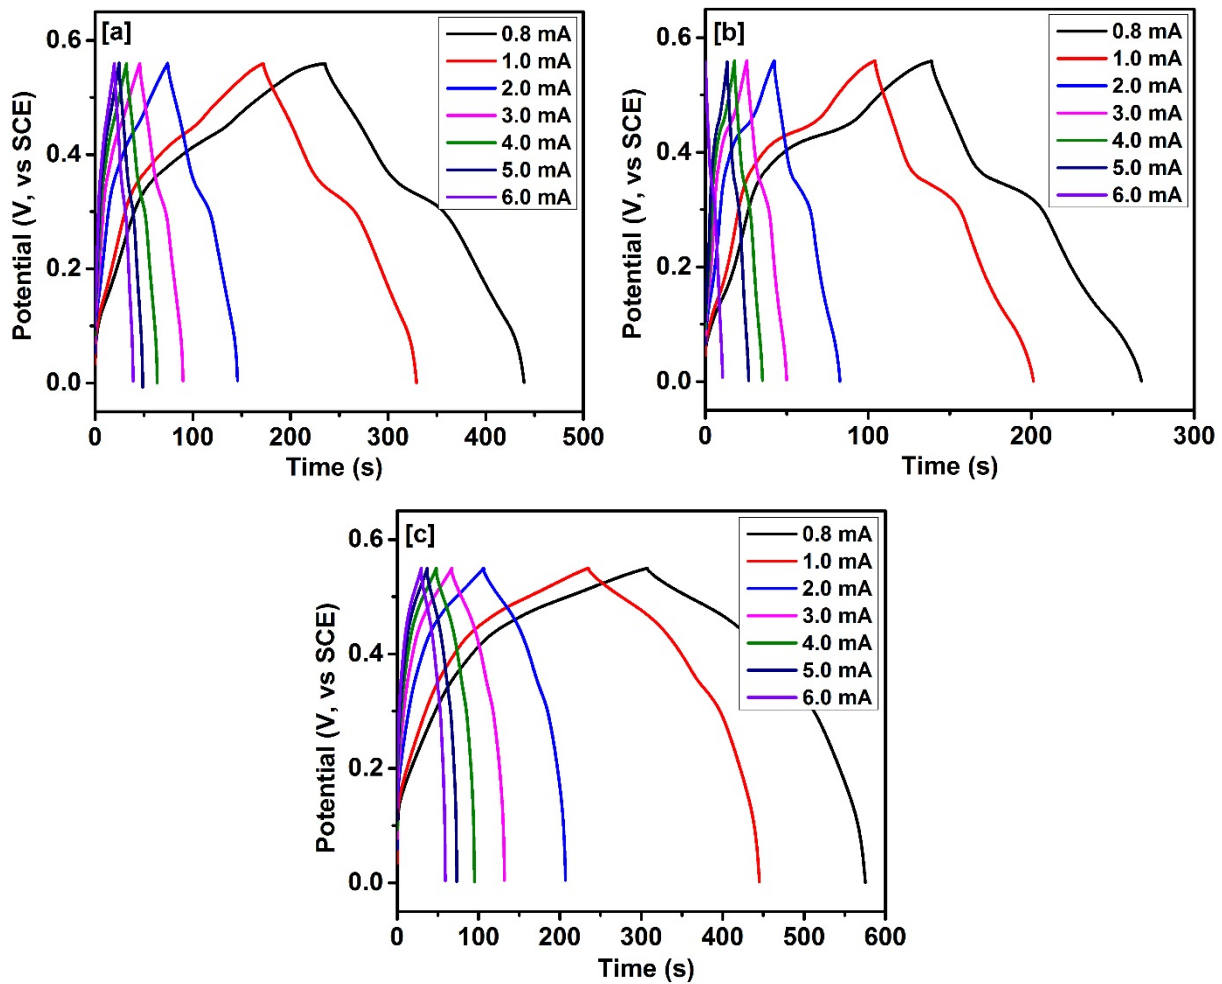

**Fig. 3S:** Galvanostatic charge-discharge characteristics of (a) CMO-1, (b) CMO-2, and (c) CMO-3 at different currents in 3M KOH electrolyte.

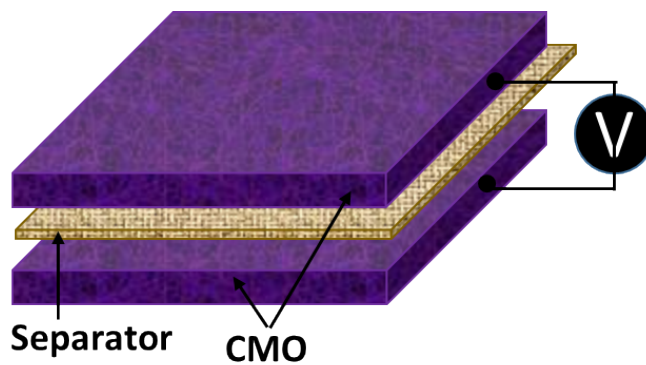

**Fig. 4S:** Schematic diagram of the fabricated device.

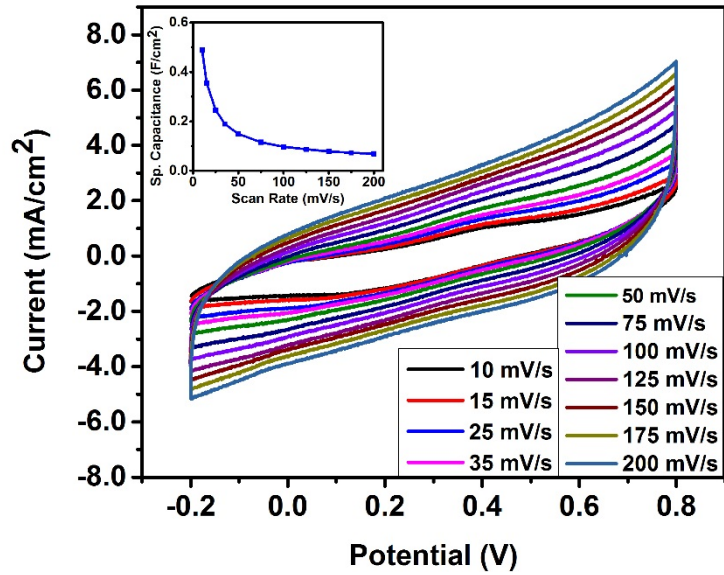

**Fig. 5S:** CV curves of the device at various scan rates. Inset figure shows the specific capacitance vs scan rate for the same device.

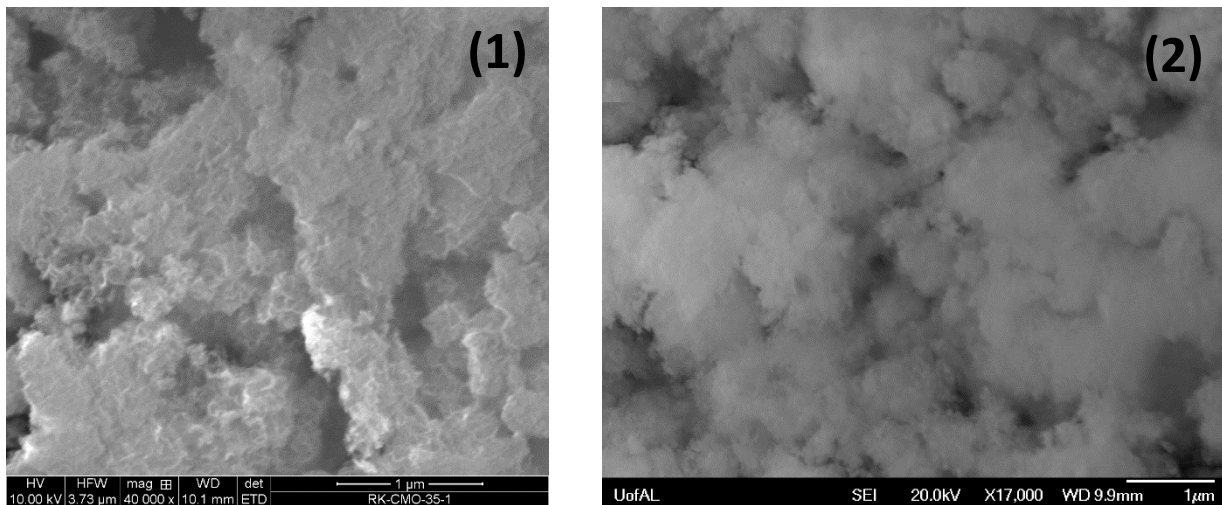

**Fig. 6S:** SEM images of CMO-3 before (1) and after (2) bending and electrochemical measurements at high temperature.

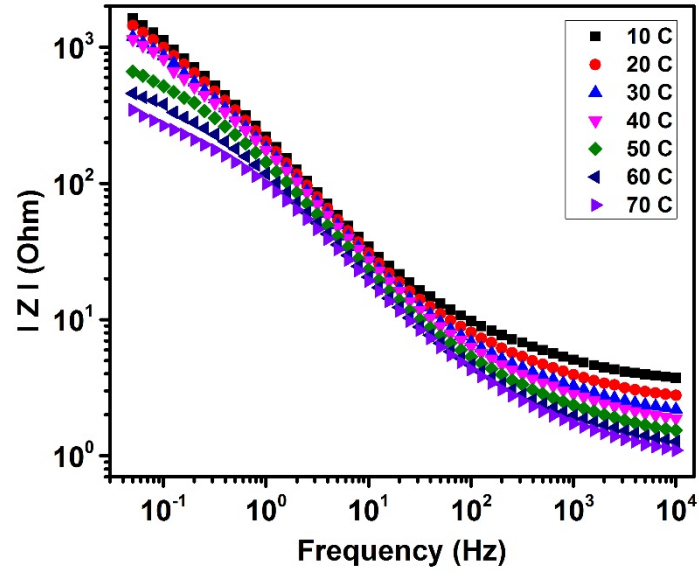

**Fig. 7S:** Z vs frequency plots of the device at various temperatures.
